# Supplementary material
Source: Springer Nature journal article supplement (https://www.springermedizin.de/resource/supplementary/12960_2006_68_MOESM2_ESM.pdf/9570360)
Supplement: MOESM2 [file 9570360]

HIGH-SKILL

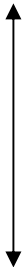

Doctors and other health professions (pharmacists etc.)

Registered nurses

Auxiliary nurses

LOW-SKILL
